1 **The prophase oocyte nucleus is a homeostatic G-actin buffer**

2

3 Kathleen Scheffler\*, Federica Giannini\* and Binyam Mogessie

4

5 School of Biochemistry, University of Bristol, BS8 1TD, Bristol, UK

6

7 \*Equal contribution authors

8

9 Correspondence: [binyam.mogessie@bristol.c.uk](mailto:binyam.mogessie@bristol.c.uk)

10

11 **One Sentence Summary:** Mammalian oocyte nuclei buffer cytosolic G-actin

12

13 **Abstract**

14 **Formation of healthy mammalian eggs from oocytes requires specialised F-**  
15 **actin structures. F-actin disruption produces aneuploid eggs, which are a**  
16 **leading cause of human embryo deaths, genetic disorders, and infertility. We**  
17 **found that oocytes regulate F-actin organisation and function by promptly**  
18 **transferring excess monomeric G-actin from the cytoplasm to the nucleus.**  
19 **Inside healthy oocyte nuclei, transferred monomers form dynamic F-actin**  
20 **structures, a conserved feature that significantly declines with maternal age.**  
21 **Monomer transfer must be controlled tightly. Blocked nuclear import of G-actin**  
22 **triggers assembly of a dense cytoplasmic F-actin network, while excess G-actin**  
23 **in the nucleus dramatically stabilises nuclear F-actin. Imbalances in either**  
24 **direction predispose oocytes to aneuploidy. The large oocyte nucleus is thus a**  
25 **homeostatic G-actin buffer that is used to maintain cytoplasmic F-actin form**  
26 **and function.**

27

28 Mammalian eggs are formed when oocyte chromosomes are segregated during  
29 meiosis [1], successful completion of which is a prerequisite for healthy  
30 embryogenesis and development. Meiotic errors in oocytes are a leading cause of  
31 aneuploidies that underlie human infertility and genetic disorders such as Down's  
32 syndrome [2]. Distinct F-actin polymers assembled from soluble G-actin monomers  
33 ensure the production of healthy eggs from oocytes. These actin-rich drivers include  
34 a network of cytoplasmic actin filaments which oversee long-range vesicle transport  
35 [3] and asymmetric division in mammalian oocytes [4-6]. In addition, oocyte meiotic  
36 spindles in several mammalian species contain actin filaments that aid microtubule  
37 fibres in chromosome separation [7].

38 We have now found that the intact nucleus of prophase-arrested, non-manipulated  
39 mouse oocytes also contains prominent actin filaments (Fig. 1A). Using fluorescent  
40 phalloidin, we detected actin filaments and bundles in the nucleoplasm of 80% of fixed  
41 oocytes that we analysed (Fig. 1, B and C). Notably, this observation was strain- and  
42 species-independent as we could detect nuclear F-actin structures in oocytes isolated  
43 from outbred and inbred mouse (Fig. S1, A and B) and sheep ovaries (Fig. S1C).  
44 Super-resolution live imaging of nuclear F-actin using very low and non-stabilising  
45 concentrations of a fluorescently-labelled actin nanobody (nuclear actin  
46 chromobody)[8] (Fig. S1D) further revealed that these filaments are highly mobile –

47 filaments continuously move about in non-directed fashion within the nucleoplasm  
48 (Fig. 1D and movies S1 and S2). Nuclear F-actin presence remarkably associated with  
49 distinct organisation of chromatin surrounding the nucleolus (Fig. S1, E and F), a  
50 marker of high oocyte meiotic competence and developmental capacity [9]. This  
51 indicates that nuclear F-actin structures are a common feature of healthy mammalian  
52 oocytes.

53 Unexpectedly, we observed that disruption of the oocyte cytoplasmic actin network  
54 using Cytochalasin D [3] triggers excessive nuclear F-actin assembly (Fig. 2, A and  
55 B). To confirm this, we imaged by high-resolution microscopy fluorescent phalloidin-  
56 labelled nuclear actin filaments, then selectively reconstructed them in three-  
57 dimensions and quantified their volume inside the nuclei (marked with nuclear  
58 membrane antibodies) of DMSO (Control)- or Cytochalasin D-treated oocytes (Fig.  
59 2A). This showed a near forty-fold increase in nuclear F-actin volume after disruption  
60 of the cytoplasmic actin network (Fig. 2C). Bulk transfer of G-actin from a large  
61 cytoplasm to a smaller nuclear volume in Cytochalasin D-treated oocytes could  
62 increase nuclear actin monomer concentration and cause excess F-actin  
63 polymerisation. Such filaments are likely to be drug-resistant because Cytochalasin D  
64 is generally less effective at high actin monomer concentration [10]. We tested this  
65 possibility using Latrunculin, a mechanistically distinct compound that complements  
66 our Cytochalasin D studies by disrupting the cytoplasmic actin network (Fig. 2D) rather  
67 by sequestering monomers and preventing their addition to actin filaments [11-13]. In  
68 this context, more cytosolic monomers would still be transferred to the nucleus but  
69 cannot participate in actin polymerisation. In stark contrast to Cytochalasin D  
70 treatment, nuclei in Latrunculin B-treated oocytes were not more likely to contain actin  
71 filaments (Fig. 2E) and only showed a two-fold increase in F-actin volume (Fig. 2F and  
72 S2A). Thus, the concentration of polymerisation-ready monomers transferred from the  
73 cytoplasm determines the degree of F-actin assembly in the oocyte nucleus. We  
74 directly tested whether high monomeric G-actin concentration is sufficient to induce  
75 nuclear F-actin polymerisation in oocytes. We exceeded endogenous nuclear  
76 monomeric G-actin concentration in mouse oocytes by targeting FLAG-beta-actin to  
77 the nucleus via the SV40 nuclear localisation signal (NLS). This led to a ten-fold  
78 increase in nuclear F-actin volume in FLAG-beta-actin-NLS expressing oocytes, which  
79 were also more likely to contain F-actin than FLAG-NLS expressing Control oocytes

80 (Fig. 2, G-I). Therefore, the concentration of monomeric G-actin in the nucleus indeed  
81 dictates the extent of nuclear F-actin polymerisation.

82 To further examine the transfer of G-actin monomers to the nucleus, we blocked  
83 nuclear import in prophase-arrested oocytes using a combination of Importazole and  
84 Ivermectin [14, 15] (Fig. S3A), before disrupting the cytoplasmic actin network.  
85 Cytochalasin D treatment of oocytes did not cause excessive nuclear F-actin assembly  
86 when nuclear import was blocked (Fig. 2, C, J and K, S3B). In addition, nuclear import  
87 blockage caused distinct accumulation of actin on the surface of the oocyte nucleus  
88 (Fig. S3D), which supported the notion that actin monomers are nuclear import  
89 cargoes in oocytes. Surprisingly, Cytochalasin D treatment of nuclear import-defective  
90 oocytes resulted in a significantly denser cytoplasmic actin network that was  
91 composed of drug-resistant filaments (Fig. 2, J, L, S3C). This is consistent with a  
92 significant rise in cytosolic monomeric G-actin concentration, caused by blocked  
93 nuclear import, reducing Cytochalasin D activity [10]. Transfer of excess G-actin  
94 monomers to the nucleus is therefore necessary to maintain cytoplasmic F-actin  
95 network organisation in oocytes. This is supported by the observation that blocking  
96 nuclear import alone significantly increases cytoplasmic actin network density (Fig. S3,  
97 D and E). We propose that shuttling of cytosolic monomers into a large (~30 µm  
98 diameter) nucleus is a physiological G-actin buffering process that oocytes  
99 continuously use to modulate the cytoplasmic actin network.

100 To investigate meiotic consequences of dysfunctional G-actin buffering, we induced  
101 excess nuclear F-actin polymerisation by treating oocytes with Cytochalasin D (Fig.  
102 2A) or by expressing a nuclear actin mutant (FLAG-beta-actin-S14C-NLS) that is more  
103 able to polymerise [16, 17] (Fig. 2, G-I). We then visualised chromatin (marked with  
104 SiR-DNA) and the nuclear envelope (marked with fluorescent nuclear membrane  
105 nanobodies) at high-temporal resolution. Initial analysis of these data indicated that  
106 excess nuclear actin filaments led to notably reduced chromatin mobility (Fig. 3, A and  
107 E, movies S3-S6), which in turn affects transcription in mouse oocytes [18]. We  
108 investigated this further by automated three-dimensional tracking of prominent  
109 chromatin spots throughout the nucleoplasm (Fig. 3, A and E). Indeed, when nuclei  
110 contained excess F-actin, chromatin spots showed significantly less movement over  
111 time (Fig. 3, B-D and F-H). Directly visualising chromatin (marked with histone H2B)  
112 and excess F-actin using overexpressed actin chromobody revealed that stable  
113 nuclear actin filaments can indeed physically entrap chromatin (Fig. S4A, movie S7).

114 Ultimately, excess nuclear F-actin bundles compromise meiosis and cause aneuploidy  
115 - these highly stable bundles persisted in FLAG-beta-actin-S14C-NLS expressing  
116 oocytes even after nuclear envelope disassembly (Fig. S4B) and severely interfered  
117 with chromosome alignment and segregation (Fig. 4, A-D and S4C, movies S8 and  
118 S9). Super-resolution immunofluorescence microscopy further demonstrated that after  
119 nuclear envelope disassembly stable nuclear F-actin structures become embedded in  
120 meiotic spindles and spindle poles where they obstruct chromosomal organisation  
121 (Fig. S4B). Therefore, homeostatic G-actin buffering in prophase oocytes must be fine-  
122 tuned to prevent excessive assembly of nuclear actin filaments that might interfere  
123 with successful completion of meiosis.

124 When prophase-arrested oocytes resume meiosis and initiate nuclear envelope  
125 disassembly en route to becoming eggs, density of the cytoplasmic F-actin network is  
126 progressively reduced – this is thought to support asymmetric cell division [4]. During  
127 this process, mouse oocytes were shown to control F-actin network density by  
128 adjusting the number and volume of vesicles in the cytoplasm [4]. In this context,  
129 homeostatic buffering of monomeric G-actin by the oocyte nucleus may aid vesicle-  
130 based actin network regulation.

131 Importantly, we found that the amount and complexity of nuclear F-actin structures  
132 declines significantly with increasing maternal age in non-manipulated mouse oocytes,  
133 with oocytes from 12 month old mothers having only 27% of the nuclear F-actin level  
134 observed in younger (8-12 week old) mothers (Fig. 4, E-G and Fig. S5, A and B).  
135 While we cannot fully exclude maternal age-dependent changes in cytosolic G-actin  
136 may contribute to nuclear F-actin decline, we did not detect changes in the cytoplasmic  
137 F-actin network of oocytes from older mothers (Fig. S5C). This raises the intriguing  
138 possibility that G-actin buffering defects may contribute to lower quality of eggs in  
139 reproductively older women.

140 Homeostatic G-actin buffering (Fig. 4H) could be a widely conserved function of large  
141 mammalian oocyte nuclei. For instance, prophase nuclei in non-manipulated sheep  
142 oocytes can also contain prominent nuclear actin filaments (Fig. S1C). Interestingly,  
143 nuclear F-actin is known to assemble in a variety of cellular contexts in non-gamete  
144 cells and embryos [8, 19-24] with postulated functions ranging from DNA repair to  
145 chromatin organisation. It will be important to explore whether the oocyte G-actin  
146 buffering process we describe here is a universal feature of mammalian nuclei and  
147 non-mammalian models where F-actin structures are intimately associated with the

148 nucleus [25, 26]. In addition, mechanotransduction of actin-based forces to the  
149 nucleus is known to modulate nuclear mechanics and function in health and disease  
150 [27-29]. However, a direct role of the nucleus itself in this process by regulating  
151 cytosolic G-actin concentration, and thus F-actin assembly and force generation,  
152 should now be considered. Finally, our data indicate that commonly used actin drugs  
153 unintentionally stabilise nuclear F-actin and significantly affect nuclear mechanics. This  
154 will have important implications for past and future studies of sub-cellular actin-based  
155 structures in single- and multi-nucleated cells.

156

## 157 **References**

- 158 1. Mogessie, B., Scheffler, K., and Schuh, M. (2018). Assembly and Positioning  
159 of the Oocyte Meiotic Spindle. *Annu Rev Cell Dev Biol*.
- 160 2. Herbert, M., Kalleas, D., Cooney, D., Lamb, M., and Lister, L. (2015). Meiosis  
161 and maternal aging: insights from aneuploid oocytes and trisomy births. *Cold  
162 Spring Harb Perspect Biol* 7, a017970.
- 163 3. Schuh, M. (2011). An actin-dependent mechanism for long-range vesicle  
164 transport. *Nat Cell Biol* 13, 1431-1436.
- 165 4. Holubcova, Z., Howard, G., and Schuh, M. (2013). Vesicles modulate an actin  
166 network for asymmetric spindle positioning. *Nat Cell Biol* 15, 937-947.
- 167 5. Schuh, M., and Ellenberg, J. (2008). A new model for asymmetric spindle  
168 positioning in mouse oocytes. *Curr Biol* 18, 1986-1992.
- 169 6. Azoury, J., Lee, K.W., Georget, V., Rassinier, P., Leader, B., and Verlhac, M.H.  
170 (2008). Spindle positioning in mouse oocytes relies on a dynamic meshwork of  
171 actin filaments. *Curr Biol* 18, 1514-1519.
- 172 7. Mogessie, B., and Schuh, M. (2017). Actin protects mammalian eggs against  
173 chromosome segregation errors. *Science* 357.
- 174 8. Baarlink, C., Plessner, M., Sherrard, A., Morita, K., Misu, S., Virant, D.,  
175 Kleinschnitz, E.M., Harniman, R., Alibhai, D., Baumeister, S., et al. (2017). A  
176 transient pool of nuclear F-actin at mitotic exit controls chromatin organization.  
177 *Nat Cell Biol* 19, 1389-1399.
- 178 9. Zuccotti, M., Giorgi Rossi, P., Martinez, A., Garagna, S., Forabosco, A., and  
179 Redi, C.A. (1998). Meiotic and developmental competence of mouse antral  
180 oocytes. *Biol Reprod* 58, 700-704.
- 181 10. Carlier, M.F., Criquet, P., Pantaloni, D., and Korn, E.D. (1986). Interaction of  
182 cytochalasin D with actin filaments in the presence of ADP and ATP. *J Biol  
183 Chem* 261, 2041-2050.
- 184 11. Spector, I., Shochet, N.R., Kashman, Y., and Groweiss, A. (1983). Latrunculin:  
185 novel marine toxins that disrupt microfilament organization in cultured cells.  
186 *Science* 219, 493-495.
- 187 12. Coue, M., Brenner, S.L., Spector, I., and Korn, E.D. (1987). Inhibition of actin  
188 polymerization by latrunculin A. *FEBS Lett* 213, 316-318.
- 189 13. Morton, W.M., Ayscough, K.R., and McLaughlin, P.J. (2000). Latrunculin alters  
190 the actin-monomer subunit interface to prevent polymerization. *Nat Cell Biol* 2,  
191 376-378.

- 192 14. Soderholm, J.F., Bird, S.L., Kalab, P., Sampathkumar, Y., Hasegawa, K.,  
193 Uehara-Bingen, M., Weis, K., and Heald, R. (2011). Importazole, a small  
194 molecule inhibitor of the transport receptor importin-beta. *ACS Chem Biol* 6,  
195 700-708.
- 196 15. Wagstaff, K.M., Sivakumaran, H., Heaton, S.M., Harrich, D., and Jans, D.A.  
197 (2012). Ivermectin is a specific inhibitor of importin alpha/beta-mediated nuclear  
198 import able to inhibit replication of HIV-1 and dengue virus. *Biochem J* 443, 851-  
199 856.
- 200 16. Posern, G., Miralles, F., Guettler, S., and Treisman, R. (2004). Mutant actins  
201 that stabilise F-actin use distinct mechanisms to activate the SRF coactivator  
202 MAL. *EMBO J* 23, 3973-3983.
- 203 17. Wei, M., Fan, X., Ding, M., Li, R., Shao, S., Hou, Y., Meng, S., Tang, F., Li, C.,  
204 and Sun, Y. (2020). Nuclear actin regulates inducible transcription by  
205 enhancing RNA polymerase II clustering. *Sci Adv* 6, eaay6515.
- 206 18. Almonacid, M., Al Jord, A., El-Hayek, S., Othmani, A., Culpier, F., Lemoine,  
207 S., Miyamoto, K., Grosse, R., Klein, C., Piolot, T., et al. (2019). Active  
208 Fluctuations of the Nuclear Envelope Shape the Transcriptional Dynamics in  
209 Oocytes. *Dev Cell* 51, 145-157 e110.
- 210 19. Baarlink, C., Wang, H., and Grosse, R. (2013). Nuclear actin network assembly  
211 by formins regulates the SRF coactivator MAL. *Science* 340, 864-867.
- 212 20. Caridi, C.P., Plessner, M., Grosse, R., and Chiolo, I. (2019). Nuclear actin  
213 filaments in DNA repair dynamics. *Nat Cell Biol* 21, 1068-1077.
- 214 21. Plessner, M., Melak, M., Chinchilla, P., Baarlink, C., and Grosse, R. (2015).  
215 Nuclear F-actin formation and reorganization upon cell spreading. *J Biol Chem*  
216 290, 11209-11216.
- 217 22. Wang, Y., Sherrard, A., Zhao, B., Melak, M., Trautwein, J., Kleinschnitz, E.M.,  
218 Tsopoulidis, N., Fackler, O.T., Schwan, C., and Grosse, R. (2019). GPCR-  
219 induced calcium transients trigger nuclear actin assembly for chromatin  
220 dynamics. *Nat Commun* 10, 5271.
- 221 23. Kelsch, D.J., and Tootle, T.L. (2018). Nuclear Actin: From Discovery to  
222 Function. *Anat Rec (Hoboken)* 301, 1999-2013.
- 223 24. Wesolowska, N., and Lenart, P. (2015). Nuclear roles for actin. *Chromosoma*  
224 124, 481-489.
- 225 25. Mori, M., Somogyi, K., Kondo, H., Monnier, N., Falk, H.J., Machado, P., Bathe,  
226 M., Nedelec, F., and Lenart, P. (2014). An Arp2/3 nucleated F-actin shell  
227 fragments nuclear membranes at nuclear envelope breakdown in starfish  
228 oocytes. *Curr Biol* 24, 1421-1428.
- 229 26. Wesolowska, N., Aivilov, I., Machado, P., Geiss, C., Kondo, H., Mori, M., and  
230 Lenart, P. (2020). Actin assembly ruptures the nuclear envelope by prying the  
231 lamina away from nuclear pores and nuclear membranes in starfish oocytes.  
232 *Elife* 9.
- 233 27. Isermann, P., and Lammerding, J. (2013). Nuclear mechanics and  
234 mechanotransduction in health and disease. *Curr Biol* 23, R1113-1121.
- 235 28. Martino, F., Perestrelo, A.R., Vinarsky, V., Pagliari, S., and Forte, G. (2018).  
236 Cellular Mechanotransduction: From Tension to Function. *Front Physiol* 9, 824.
- 237 29. Alisafaei, F., Jokhun, D.S., Shivashankar, G.V., and Shenoy, V.B. (2019).  
238 Regulation of nuclear architecture, mechanics, and nucleocytoplasmic shuttling  
239 of epigenetic factors by cell geometric constraints. *Proc Natl Acad Sci U S A*  
240 116, 13200-13209.

- 241 30. Mogessie, B. (2020). Visualization and Functional Analysis of Spindle Actin and  
242 Chromosome Segregation in Mammalian Oocytes. *Methods Mol Biol* *2101*,  
243 267-295.
- 244 31. Mogessie, B., Roth, D., Rahil, Z., and Straube, A. (2015). A novel isoform of  
245 MAP4 organises the paraxial microtubule array required for muscle cell  
246 differentiation. *Elife* *4*, e05697.
- 247 32. Schuh, M., and Ellenberg, J. (2007). Self-organization of MTOCs replaces  
248 centrosome function during acentrosomal spindle assembly in live mouse  
249 oocytes. *Cell* *130*, 484-498.

250  
251

## Acknowledgment

252 We thank Paul Martin, David Stephens and Mark Dodding for discussion and critical  
253 comments on this manuscript, and the Animal Services Unit of the University of Bristol  
254 for technical assistance. We are grateful to Grazvydas Lukinavicius (MPI-BPC) for  
255 sharing improved and healthier derivatives of SiR-DNA dyes for labelling oocyte  
256 chromatin. This work was supported by a Sir Henry Dale Fellowship jointly funded by  
257 the Wellcome Trust and the Royal Society [grant number 213470/Z/18/Z]. The authors  
258 declare no competing financial interests.

259 K.S. performed experiments, analysed data, prepared figures, and revised the  
260 manuscript. F.G. performed experiments and revised the manuscript. B.M. performed  
261 experiments, analysed data, prepared figures, wrote the manuscript, and supervised  
262 the study.

263

## Supplementary Materials

264 Materials and Methods

265 Fig S1-S5

266 References (30-32)

267 Movies S1-S9

268

## Materials and Methods

### Preparation and microinjection of mammalian oocytes

271 All mice were maintained in a specific pathogen-free environment according to UK  
272 Home Office regulations and the guidelines of the University of Bristol Animal Services  
273 Unit. Oocytes were isolated from ovaries of 8-12 week old (young CD-1 mice), 10-12  
274 months old (old CD-1 mice) or 8-12 weeks old 129 S6/SvEvTac mice, cultured, and  
275 microinjected with 6-8 picolitres of *in vitro* transcribed mRNA as described in detail  
276 recently [30].  
277



278 Ovine ovaries were obtained from a University of Bristol Veterinary School  
279 slaughterhouse and transported to the laboratory at 37°C in M2 medium. Oocytes  
280 covered with several layers of cumulus cells were collected from ovaries by aspiration  
281 with an 18-gauge needle and cultured in M2 medium supplemented with 750 µM N6,2'-  
282 O-Dibutyryl adenosine 3',5'-cyclic monophosphate sodium salt (dbcAMP) before  
283 fixation and processing.

284

### 285 **Generation of expression constructs and mRNA synthesis**

286 To mark microtubules, EGFP variant of the microtubule binding domain of mouse  
287 MAP4 (MAP4-MTBD, 659-1125 aa) [31] was generated as described in [7]. To label  
288 chromosomes, the coding sequence of Histone H2B was obtained from mouse cDNA  
289 and transferred by Gibson assembly into the HindIII site of pmRFP-N3 using primers  
290 5'GGACTCAGATCTCGAGCTCAATGCCTGAGCCTGCGAAG3' and  
291 5'CCGTCGACTGCAGAATTCGACTTGGAGCTGGTGTACTTGG3'. The fragment  
292 corresponding to H2B-mRFP was then transferred into the XhoI-NotI site of pGEMHE  
293 [32] to generate the final construct pGEM-H2B-mRFP. To label nuclear actin,  
294 fluorescent nuclear actin nanobody (nuclear actin chromobody) plasmid was  
295 purchased from ChromoTek and transferred into the HindIII-EcoRI site of pGEMHE.  
296 To label the nuclear envelope, fluorescent lamin nanobody (lamin chromobody)  
297 plasmid was purchased from ChromoTek and transferred into the NcoI-XbaI site of  
298 pGEMHE. Wild type and S14C actin mutant expression constructs were generated  
299 using a synthetic construct encoding the SV40 nuclear localization signal (NLS)  
300 (5'CCGCCTAAGAAAAGCGGAAGGTG3') fused to mouse beta-actin  
301 (NM\_007393.5). pGEM-FLAG-NLS beta-actin was generated by PCR linearization of  
302 pGEMHE with primers 5' AATTCTGCAGTCGACGGC3' and 5'  
303 CGAAGCTTGAGCTCGAGATC3' and joining by Gibson assembly with NLS-Beta-  
304 Actin that was flanked by primers  
305 5'GATCTCGAGCTCAAGCTTCGATG***GACTACAAGGACGACGACGACAAGGGGC***  
306 ***CGCCTAAG3'*** and 5'GGGCCGTCGACTGCAGAATTTTAGAAGCACTTGCGGTG3'.  
307 The coding sequence of the FLAG peptide DYKDDDDK is shown in bold italicized  
308 text. pGEM-FLAG-NLS-beta-actin-S14C mutant was generated by site-directed  
309 mutagenesis using primers 5'GTCGTCGACAACGGCTGCGGCATGTGCAAAGCC3'  
310 and 5'GGCTTTGCACATGCCGCAGCCGTTGTGCGACGAC3'.

311 Capped mRNA was synthesized using T7 polymerase (mMessage mMachine kit,  
312 following the manufacturer's instructions, Ambion). mRNA concentrations were  
313 determined measurement on Nanodrop spectrophotometer (Thermo Scientific).

314

### 315 **Confocal and super-resolution live imaging**

316 Images were acquired with Zeiss LSM800 microscope at 37°C. Oocytes were imaged  
317 in M2 medium under mineral oil using a 40x C-Apochromat 1.2 NA water-immersion  
318 objective as described in more detail in [30]. Super-resolution time-lapse images were  
319 acquired using the Airyscan module on Zeiss LSM800 microscope and processed  
320 post-acquisition using ZEN2.

321

### 322 **Immunofluorescence microscopy**

323 Mouse and ovine oocytes were fixed with 100 mM HEPES, 50 mM EGTA, 10 mM  
324 MgSO<sub>4</sub>, 2% formaldehyde (v/v), and 0.5% Triton X-100 (v/v) at 37°C for 25-30 minutes  
325 (mouse) or for 60 minutes after 10 seconds pre-permeabilization in 0.4% Triton X-100  
326 (v/v) in water (ovine). Oocytes were extracted in PBS supplemented with 0.3% Triton  
327 X-100 (v/v) at 4°C overnight. Antibody, F-actin and chromosome staining were  
328 performed for 2-2.5 hours in PBS, 3% BSA (w/v), and 0.1% Triton X-100 (v/v) at room  
329 temperature. Nuclear envelope was stained using primary rabbit anti-Lamin A/C  
330 antibody (ab133256, Abcam; 1:500) and Alexa-Fluor-647-labelled secondary anti-rat  
331 (Molecular Probes 1:400) antibodies. F-actin was stained with Rhodamine or Alexa-  
332 488 phalloidin (Molecular Probes; 1:20). DNA was stained with 5 µg/ml Hoechst 33342  
333 (Molecular Probes).

334 Confocal and Airyscan super-resolution images were acquired with Zeiss LSM800  
335 confocal microscope equipped with a 40x C-Apochromat 1.2 NA water-immersion  
336 objective. Images in control and perturbation conditions were acquired with identical  
337 imaging conditions.

338

### 339 **Drug addition experiments**

340 To disrupt actin, oocytes were treated for 1 hour with Cytochalasin D (C8273-1MG,  
341 Merck) at a final concentration of 5 µg/ml or Latrunculin B (428020-1MG, Merck) at a  
342 final concentration of 5 µM in M2 medium supplemented with dbcAMP. To block  
343 nuclear import, oocytes were treated with a combination of 100 µM Importazole  
344 (SML0341-5MG, Merck) and 30 µM Ivermectin (I8000010, Merck). These final

345 concentrations were maintained in experiments where oocytes were simultaneously  
346 treated with Cytochalasin D, Importazole and Ivermectin. All drugs were dissolved in  
347 DMSO (D2650-5X5ML, Merck). Where DMSO was used as control, it was diluted  
348 identically in M2 medium supplemented with dbcAMP to corresponding experimental  
349 conditions.

350

### 351 **Chromosome alignment and segregation analysis**

352 For chromosome alignment and segregation analyses, images were acquired at a  
353 temporal resolution of 5 minutes and with a Z-stack thickness of ~40  $\mu\text{m}$  at 1.5  $\mu\text{m}$   
354 confocal sections. Chromosomes that were distinctly separate from the metaphase  
355 plate chromosome mass at the time of anaphase onset (shown in Fig. 4D) were scored  
356 as misaligned chromosomes. Chromosomes that fell behind the main mass of  
357 segregating chromosomes for at least 10 minutes after anaphase onset (shown in Fig.  
358 S4C) were scored as lagging chromosomes. For both quantifications, maximum  
359 intensity projections of only those metaphase spindles that were oriented parallel to  
360 the imaging plane at and during anaphase were analysed.

### 361 **Isosurface reconstruction and 3D volume quantification of nuclear actin** 362 **filaments**

363 For 3D volume quantification of nuclear actin filaments, confocal images of nuclei in  
364 fixed oocytes were typically acquired at a spatial resolution of 1  $\mu\text{m}$  confocal sections  
365 covering a range of 45  $\mu\text{m}$ . Isosurfaces corresponding to nuclear membranes were  
366 reconstructed in three-dimension using the Cell module of Imaris software (Bitplane)  
367 and immunofluorescence signal of nuclear envelope antibodies. The nuclear  
368 isosurface was used to mask F-actin signal and to remove cytoplasmic F-actin  
369 structures surrounding the nuclei. In the masked region, three-dimensional  
370 isosurfaces of fluorescent phalloidin-labelled nuclear actin filaments were  
371 reconstructed using similar settings between different experimental groups within each  
372 repetition. Individual values for nuclear F-actin volume were normalized to the mean  
373 value of the control group for graphical presentation.

374

### 375 **Fluorescence intensity quantification of cytoplasmic F-actin**

376 To quantify the density of the cytoplasmic actin network, single section super-  
377 resolution Airyscan images of fluorescent phalloidin-labelled cytoplasmic actin  
378 filaments were acquired. Mean fluorescence intensity of actin filaments was measured

379 in the cytoplasm from six to twelve regions per oocyte and averaged to generate  
380 cytoplasmic F-actin intensity value for each oocyte. Background subtraction was  
381 performed in ImageJ by subtracting the mean fluorescence intensity of a region  
382 outside each oocyte from its corresponding cytoplasmic F-actin intensity value.  
383 Individual fluorescence intensity values were normalized to the mean value of the  
384 control group for graphical presentation.

385

#### 386 **Four-dimensional tracking of prophase oocyte chromatin movement**

387 For analyses of chromatin mobility, nuclear membranes in prophase-arrested oocytes  
388 were labeled by microinjecting and expressing fluorescent lamin nanobodies (lamin  
389 chromobody). In genetic nuclear actin stabilization experiments, FLAG-NLS or FLAG-  
390 NLS-beta-actin-S14C mRNA were co-expressed with nuclear lamin nanobodies. To  
391 label DNA, oocytes were incubated with 250 nM 5-SiR-Hoechst (SiR-DNA) in DMSO  
392 (Grazvydas Lukinavicius, MPI-BPC) for two hours before imaging experiment, during  
393 mRNA expression. In chemical nuclear actin stabilization experiments, oocytes were  
394 incubated in DMSO or Cytochalasin D one hour before imaging experiment, during  
395 mRNA expression. Confocal images of the nuclear envelope and chromosomes were  
396 acquired at a temporal resolution of 100 seconds with a Z-stack thickness of 36  $\mu\text{m}$  at  
397 1.5  $\mu\text{m}$  confocal sections.

398

399 To exclude the contribution of nuclear movements to chromatin mobility, isosurfaces  
400 of the nuclear envelope were reconstructed using the Cell module of Imaris software  
401 (Bitplane) and fluorescent nuclear chromobody signal. Three-dimensional nuclear  
402 movement tracks obtained from these reconstructions were then used to automatically  
403 correct translational and rotational drift in Imaris. Isosurfaces of prominent chromatin  
404 spots were next reconstructed in three-dimensions using SiR-DNA fluorescence signal  
405 and tracked to automatically generate 3D tracks, which were manually corrected to  
406 remove inaccurate trajectories. Five to eight tracks of separate chromatin masses per  
407 oocyte were obtained and analyzed through this pipeline.

408

#### 409 **Statistical data analyses**

410 Histograms, statistical box plots and other graphs were generated using OriginPro  
411 software (OriginLab). Statistical box plots represent median (line), mean (small  
412 square), 5<sup>th</sup>, 95<sup>th</sup> (whiskers) and 25<sup>th</sup> and 75<sup>th</sup> percentile (box enclosing 50% of the

413 data) and are overlaid with individual data points. Average (mean), standard  
414 deviation and statistical significance based on two-tailed Student's t test or Fisher's  
415 exact test were calculated in OriginPro software (OriginLab). All error bars represent  
416 standard deviations. Two-way analysis of variance was performed in Prism software  
417 (GraphPad). Significance values are designated as \* for  $p < 0.05$ , \*\* for  $p < 0.005$   
418 and \*\*\* for  $p < 0.0005$ . Non-significant values are indicated as N.S.

419

## 420 **Supplementary Movies**

421

422 **Movie S1** Time lapse movie of nuclear F-actin (labelled with nuclear actin  
423 chromobody) in prophase-arrested mouse oocyte (oocyte 1)

424

425 **Movie S2** Time lapse movie of nuclear F-actin (labelled with nuclear actin  
426 chromobody) in prophase-arrested mouse oocyte (oocyte 2)

427

428 **Movie S3** Time lapse movie of chromatin movement in a DMSO-treated mouse  
429 oocyte. Chromatin (magenta) is labelled with SiR-DNA and nuclear membrane (grey)  
430 is labelled with lamin chromobody.

431

432 **Movie S4** Time lapse movie of chromatin movement in a Cytochalasin D-treated  
433 mouse oocyte. Chromatin (magenta) is labelled with SiR-DNA and nuclear membrane  
434 (grey) is labelled with lamin chromobody.

435

436 **Movie S5** Time lapse movie of chromatin movement in a FLAG-NLS expressing  
437 control mouse oocyte. Chromatin (magenta) is labelled with SiR-DNA and nuclear  
438 membrane (grey) is labelled with lamin chromobody.

439

440 **Movie S6** Time lapse movie of chromatin movement in a FLAG-NLS-beta-actin-S14C  
441 expressing mouse oocyte. Chromatin (magenta) is labelled with SiR-DNA and nuclear  
442 membrane (grey) is labelled with lamin chromobody.

443

444 **Movie S7** Time lapse movie of chromatin movement inside a mouse oocyte nucleus  
445 containing excess nuclear F-actin (induced by nuclear actin chromobody

446 overexpression). Chromatin (magenta) is labelled with SiR-DNA and nuclear F-actin  
447 (green) is labelled with nuclear actin chromobody.

448

449 **Movie S8** Time lapse movie of chromosome alignment and segregation during  
450 meiosis I in a FLAG-NLS expressing control mouse oocyte. Microtubules (grey) are  
451 labelled with EGFP-MAP4-MTBD and chromosomes (magenta) are labelled with H2B-  
452 mRFP.

453

454 **Movie S9** Time lapse movie of chromosome alignment and segregation during  
455 meiosis I in a FLAG-NLS-beta-actin-S14C expressing mouse oocyte. Microtubules  
456 (grey) are labelled with EGFP-MAP4-MTBD and chromosomes (magenta) are labelled  
457 with H2B-mRFP.

458

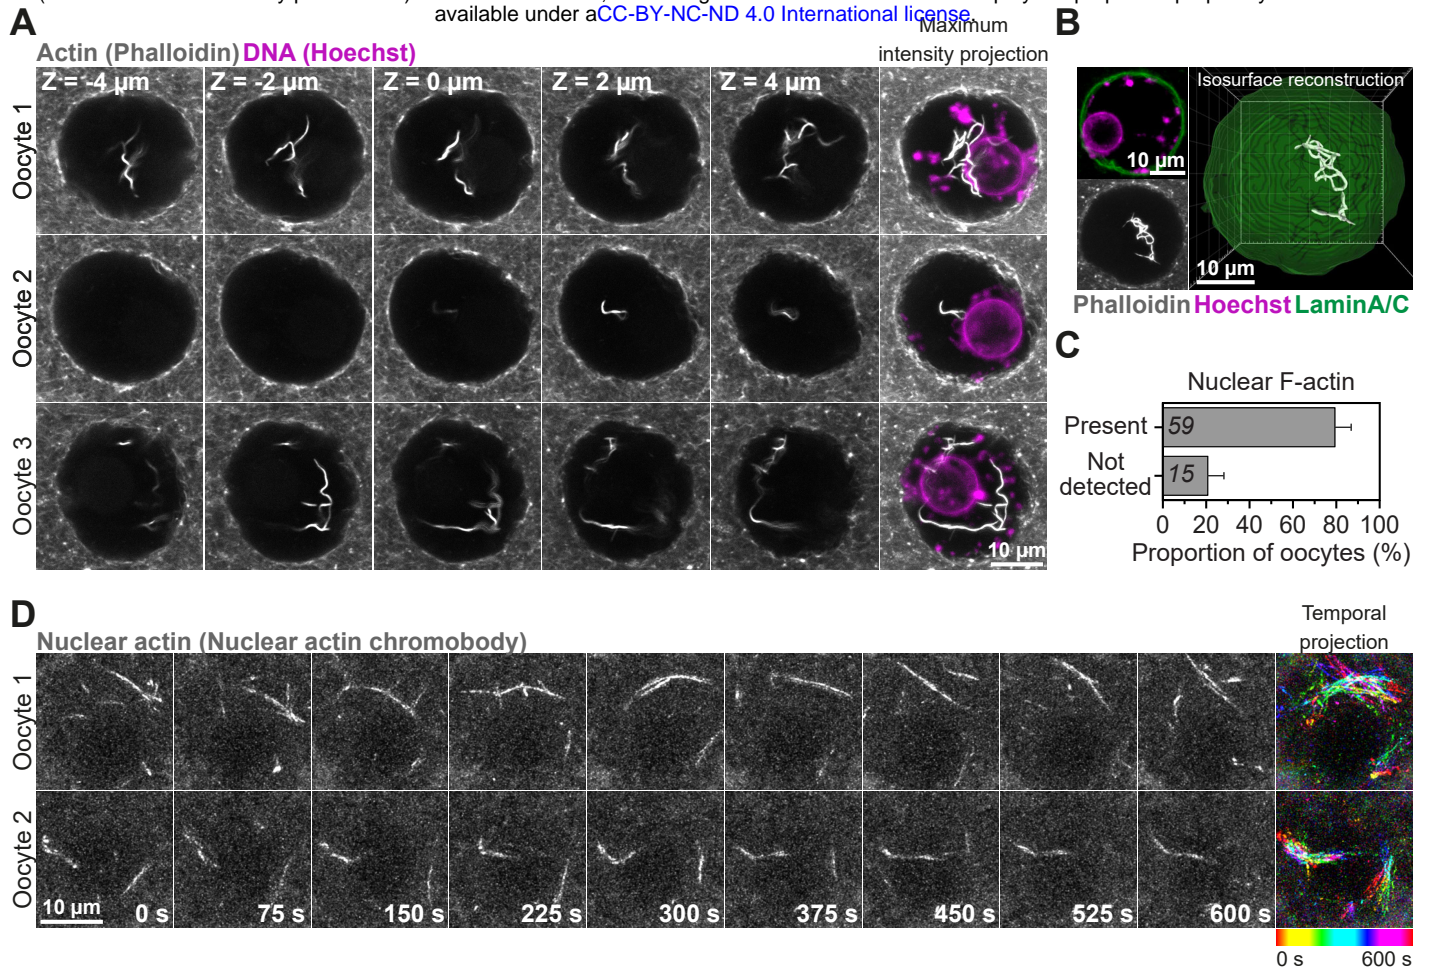

**Fig. 1 Mammalian prophase oocyte nuclei contain prominent actin filaments.**

**(A)** Phalloidin labelled nuclear actin filaments (grey) and chromosomes (Hoechst, magenta) in three prophase-arrested mouse oocytes. Single confocal sections spaced 2  $\mu\text{m}$  apart and corresponding maximum intensity projections are shown.

**(B)** Pipeline for three-dimensional isosurface reconstruction nuclear membrane (green) and nuclear F-actin (grey). DNA is shown in magenta.

**(C)** Quantification of nuclear F-actin presence in prophase-arrested mouse oocytes. Data are from 3 independent experiments.

**(D)** Super-resolution live imaging of nuclear actin filaments in two prophase-arrested mouse oocytes. Nuclear F-actin is labelled using non-stabilising concentration of a fluorescent nanobody (nuclear actin chromobody). Color-coded temporal projection images indicate continuous mobility of filaments in the 600 seconds observation time.



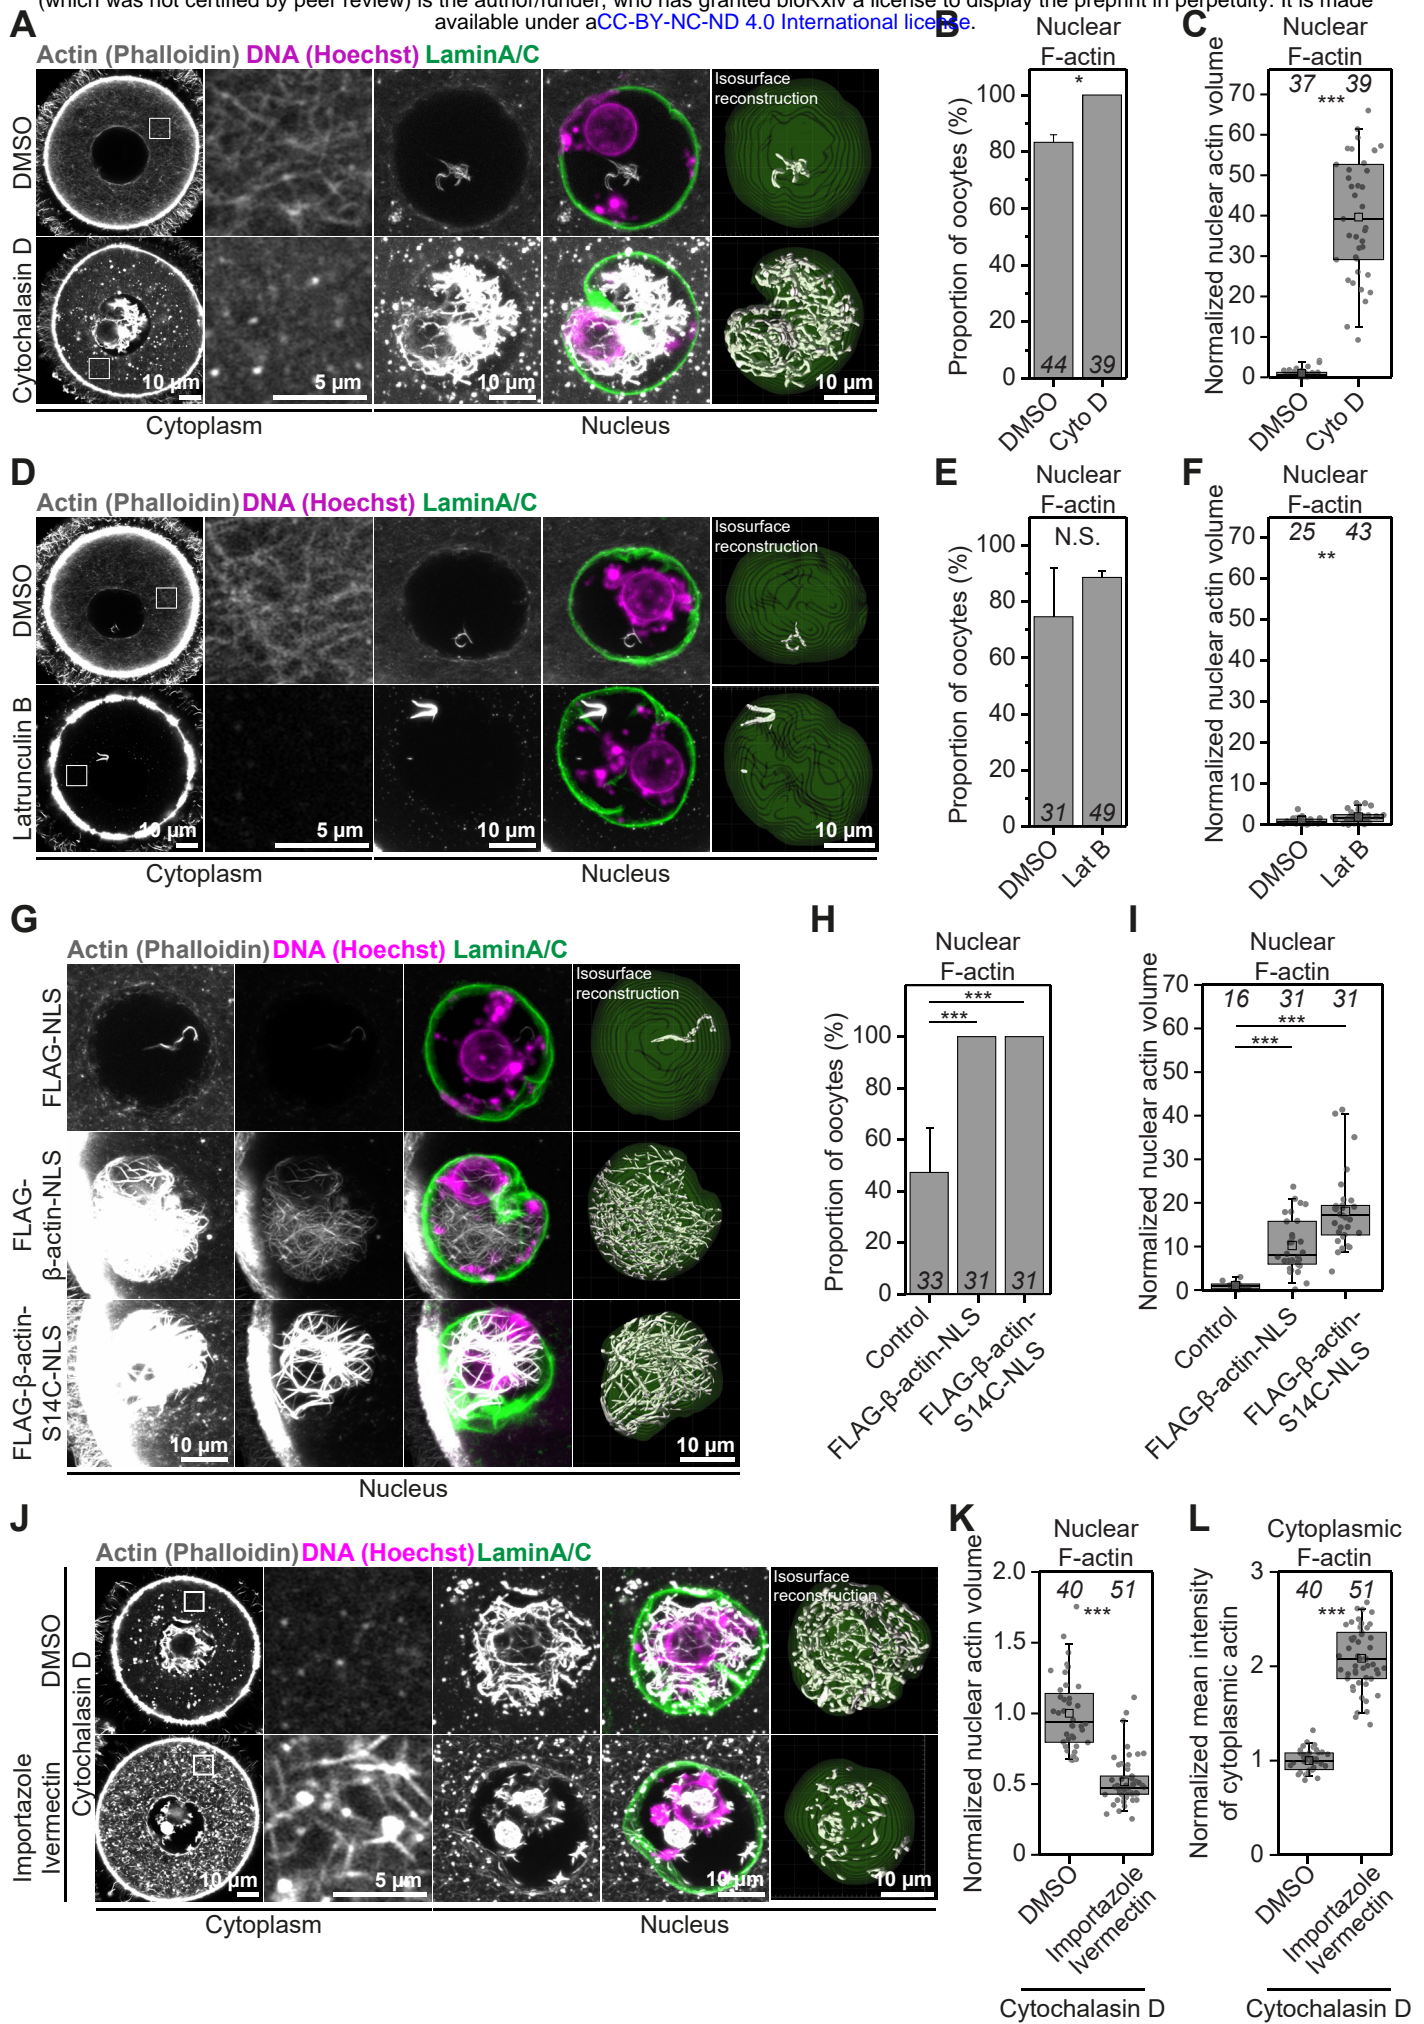

**Fig. 2 Excess G-actin causes uncontrolled cytoplasmic and nuclear F-actin assembly.**

**(A)** Single section Airyscan images of Phalloidin labelled cytoplasmic F-actin and maximum intensity projections (9 confocal sections) of nuclear actin filaments (grey), DNA (magenta) and nuclear membrane (green) in DMSO- or Cytochalasin D-treated mouse oocytes. Boxes in the oocyte cytoplasm mark regions that are magnified in insets.

**(B)** Quantification of nuclear F-actin presence in DMSO- or Cytochalasin D-treated mouse oocytes. Data are from 3 independent experiments.

**(C)** Quantification of nuclear F-actin volumes from isosurface reconstructions in A in DMSO- or Cytochalasin D-treated mouse oocytes. Data are from 3 independent experiments.

**(D)** Single section Airyscan images of Phalloidin labelled cytoplasmic F-actin and maximum intensity projections (9 confocal sections) of nuclear actin filaments (grey), DNA (magenta) and nuclear membrane (green) in DMSO- or Latrunculin B-treated mouse oocytes. Boxes in the oocyte cytoplasm mark regions that are magnified in insets.

**(E)** Quantification of nuclear F-actin presence in DMSO- or Latrunculin B-treated mouse oocytes. Data are from 3 independent experiments.

**(F)** Quantification of nuclear F-actin volumes from isosurface reconstructions in D in DMSO- or Latrunculin B-treated mouse oocytes. Data are from 3 independent experiments. Y-axis scaling with higher resolution of data distribution is provided in Fig. S2A.

**(G)** Maximum intensity projection (9 confocal sections) images of phalloidin labelled nuclear F-actin (grey), DNA (magenta) and nuclear membrane (green) in control and wild-type or S14C mutant actin expressing prophase-arrested oocytes. Excess nuclear F-actin in wild-type and S14C overexpressing oocytes is demonstrated by

presenting overexposed (when nuclear F-actin is highly visible in controls) or moderately overexposed (when nuclear F-actin is poorly visible in controls) images.

**(H)** Quantification of nuclear F-actin presence in control and wild-type or S14C actin mutant expressing mouse oocytes. Data are from 3 independent experiments.

**(I)** Quantification of nuclear F-actin volumes from isosurface reconstructions in G in control and wild-type or S14C actin mutant expressing mouse oocytes. Data are from 3 independent experiments.

**(J)** Single section Airyscan images of Phalloidin labelled cytoplasmic F-actin and maximum intensity projections (9 confocal sections) of nuclear actin filaments (grey), DNA (magenta) and nuclear membrane (green) in DMSO- or Importazole/Ivermectin-treated mouse oocytes that were then treated with Cytochalasin D. Boxes in the oocyte cytoplasm mark regions that are magnified in insets.

**(K)** Quantification of nuclear F-actin volumes from isosurface reconstructions in J in DMSO- or Importazole/Ivermectin-treated mouse oocytes that were then treated with Cytochalasin D. Data are from 3 independent experiments.

**(L)** Quantification of cytoplasmic F-actin network intensity in DMSO- or Importazole/Ivermectin-treated mouse oocytes that were then treated with Cytochalasin D. Data are from 3 independent experiments.

Statistical significance was tested using Fisher's exact test [(B), (E) and (H)] and Two-tailed Student's *t* test [(C), (F), (I), (K) and (L)].

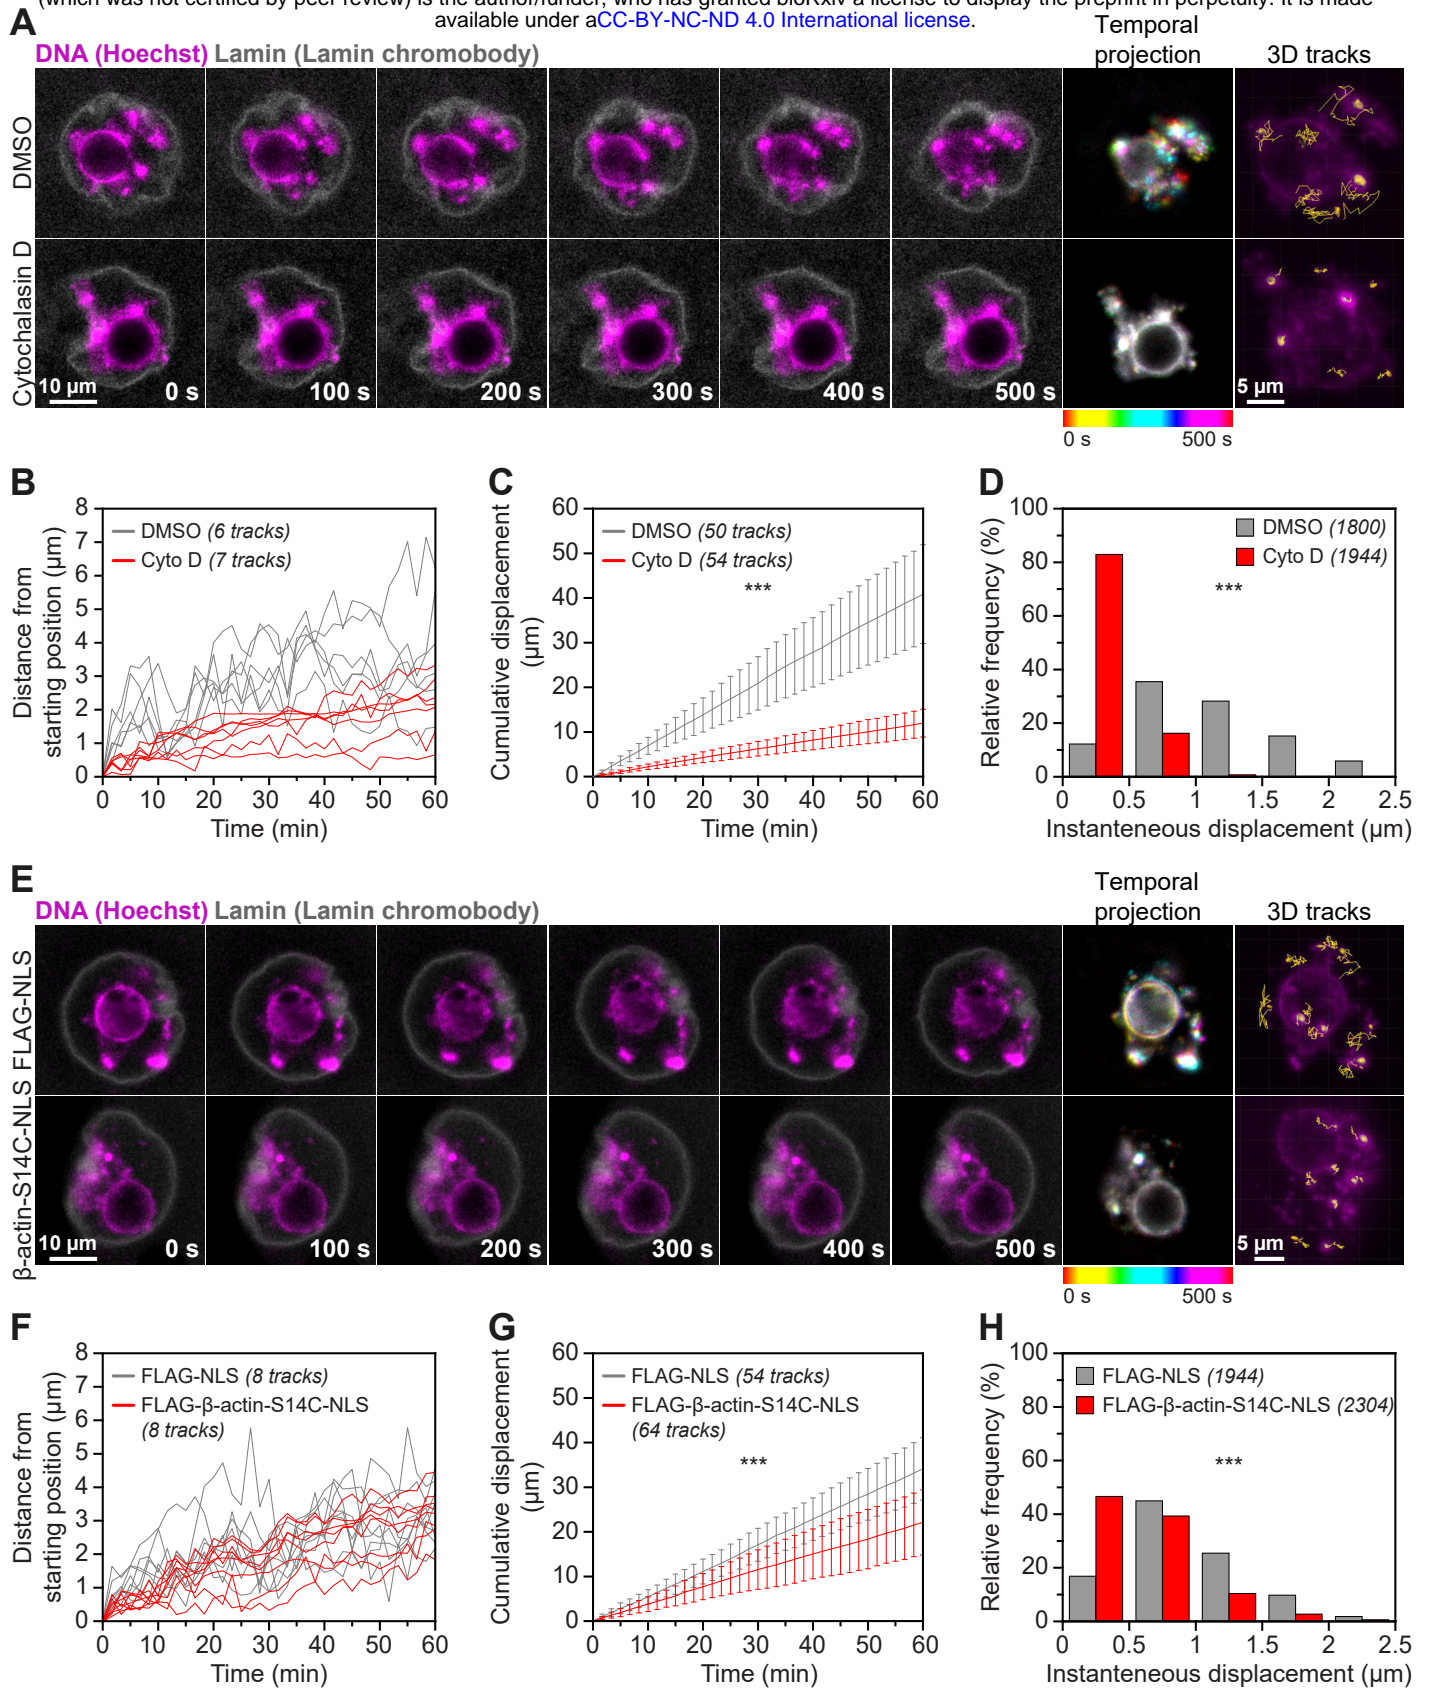

### **Fig. 3 Excess nuclear actin filaments severely restrict oocyte chromatin mobility**

**(A)** Stills from representative time lapse movies of chromatin movement in DMSO- or Cytochalasin D-treated mouse oocytes. Chromatin (SiR-DNA) is shown in magenta and nuclear membrane (Lamin chromobody) is shown in grey. Color-coded temporal projection images indicate the degree of chromatin mobility in the 500 seconds observation time. 3D tracks represent the spatial coverage of prominent chromatin spots over a 60 minutes observation period.

**(B)** Distance from starting position of prominent chromatin spots in three dimensions over a 60-minute observation period in DMSO- or Cytochalasin D-treated mouse oocytes. Data are from 3 independent experiments.

**(C)** Cumulative instantaneous displacement of prominent chromatin spots in three dimensions over a 60-minute observation period in DMSO- or Cytochalasin D-treated mouse oocytes. Data are from 3 independent experiments. Two-way analysis of variance was used to test for significance.

**(D)** Relative frequencies of chromatin spot instantaneous displacement in DMSO- or Cytochalasin D-treated mouse oocytes. Data are from 3 independent experiments. Two-tailed Student's *t* test was used to test for significance.

**(E)** Stills from representative time lapse movies of chromatin movement in control or S14C actin mutant expressing mouse oocytes. Chromatin (SiR-DNA) is shown in magenta and nuclear membrane (Lamin chromobody) is shown in grey. Color-coded temporal projection images indicate the degree of chromatin mobility in the 500 seconds observation time. 3D tracks represent the spatial coverage of prominent chromatin spots over a 60 minutes observation period.

**(F)** Distance from starting position of prominent chromatin spots in three dimensions over a 60-minute observation period in control or S14C actin mutant expressing mouse oocytes. Data are from 3 independent experiments.

**(G)** Cumulative instantaneous displacement of prominent chromatin spots in three dimensions over a 60-minute observation period in control or S14C actin mutant expressing mouse oocytes. Data are from 3 independent experiments. Two-way analysis of variance was used to test for significance.

**(H)** Relative frequencies of chromatin spot instantaneous displacement in control or S14C actin mutant expressing mouse oocytes. Data are from 3 independent experiments. Two-tailed Student's *t* test was used to test for significance.

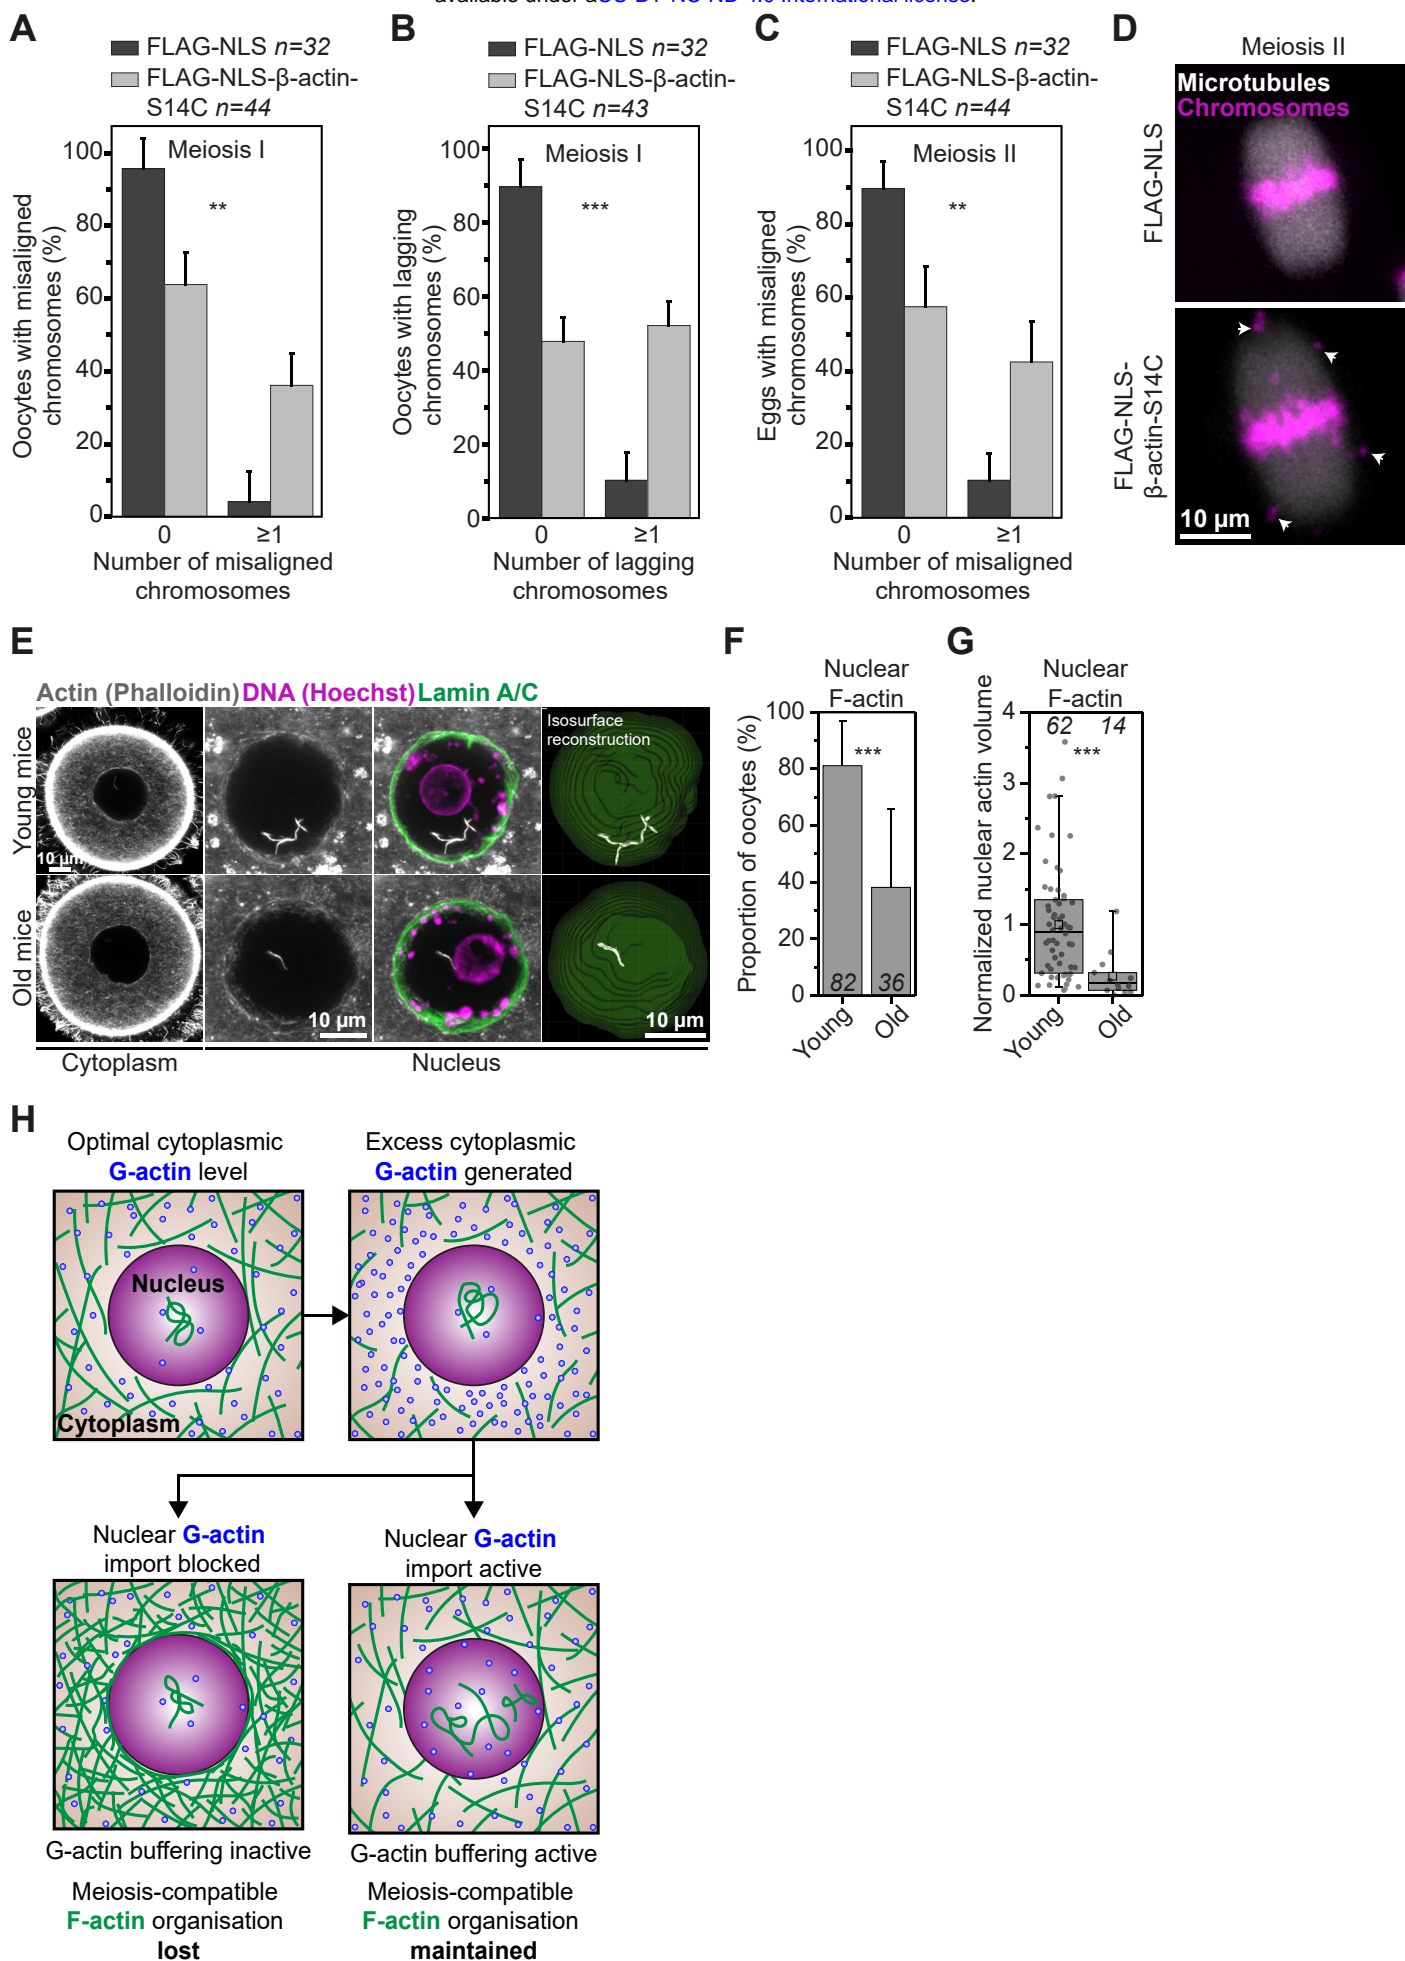

**Fig. 4 A defective homeostatic G-actin buffer contributes to mammalian oocyte aneuploidy**

(A) Frequency of misaligned chromosomes in control (optimal nuclear F-actin in prophase) and S14C actin mutant expressing (excess nuclear F-actin in prophase) mouse oocytes. Data are from 4 independent experiments.

(B) Frequency of lagging chromosomes in control (optimal nuclear F-actin in prophase) and S14C actin mutant expressing (excess nuclear F-actin in prophase) mouse oocytes. Data are from 4 independent experiments.

(C) Frequency of misaligned chromosomes in control (optimal nuclear F-actin in prophase) and S14C actin mutant expressing (excess nuclear F-actin in prophase) mouse eggs. Data are from 4 independent experiments.

(D) Representative images of fully aligned chromosomes in control (FLAG-NLS) and severely misaligned chromosomes (white arrows) in S14C actin mutant expressing mouse eggs. Microtubules (EGFP-MAP4-MTBD) are shown in grey and chromosomes (H2B-mRFP) are shown in magenta.

(E) Single section Airyscan images of Phalloidin labelled cytoplasmic F-actin and maximum intensity projections (9 confocal sections) of nuclear actin filaments (grey), DNA (magenta) and nuclear membrane (green) in oocytes isolated from young and old mice.

(F) Quantification of nuclear F-actin presence in oocytes isolated from young and old mice. Data are from 3 independent experiments.

(G) Quantification of nuclear F-actin volumes from isosurface reconstructions in E in oocytes isolated from young and old mice. Data are from 3 independent experiments.

(H) Model for regulation of cytoplasmic F-actin organisation using a homeostatic G-actin buffer. When G-actin buffering is active, excess cytosolic G-actin monomers are promptly transferred into the large oocyte nucleus. When it is defective, cytosolic G-



actin concentration rises. This leads to assembly of a dense cytoplasmic actin network that interferes with the formation of healthy eggs.

Statistical significance was tested using Fisher's exact test [(A-C) and (F)] and Two-tailed Student's *t* test (G).

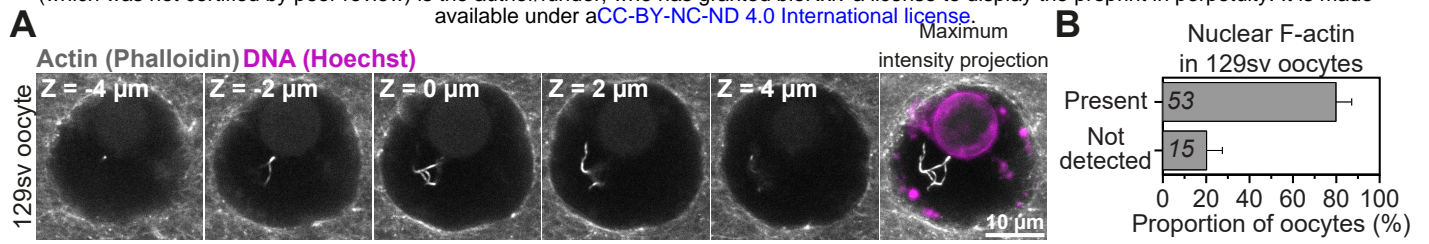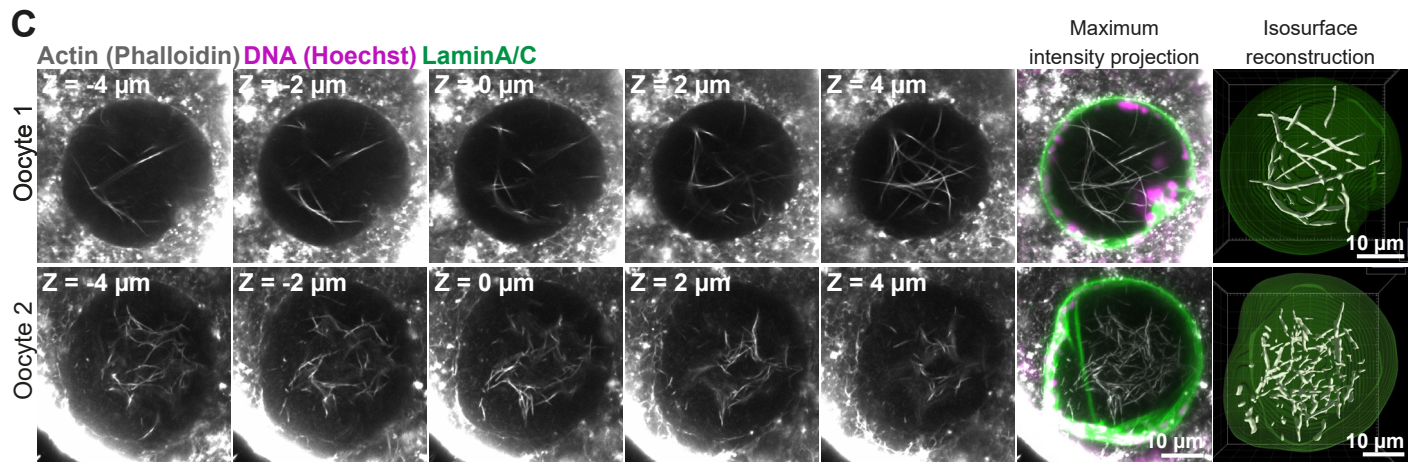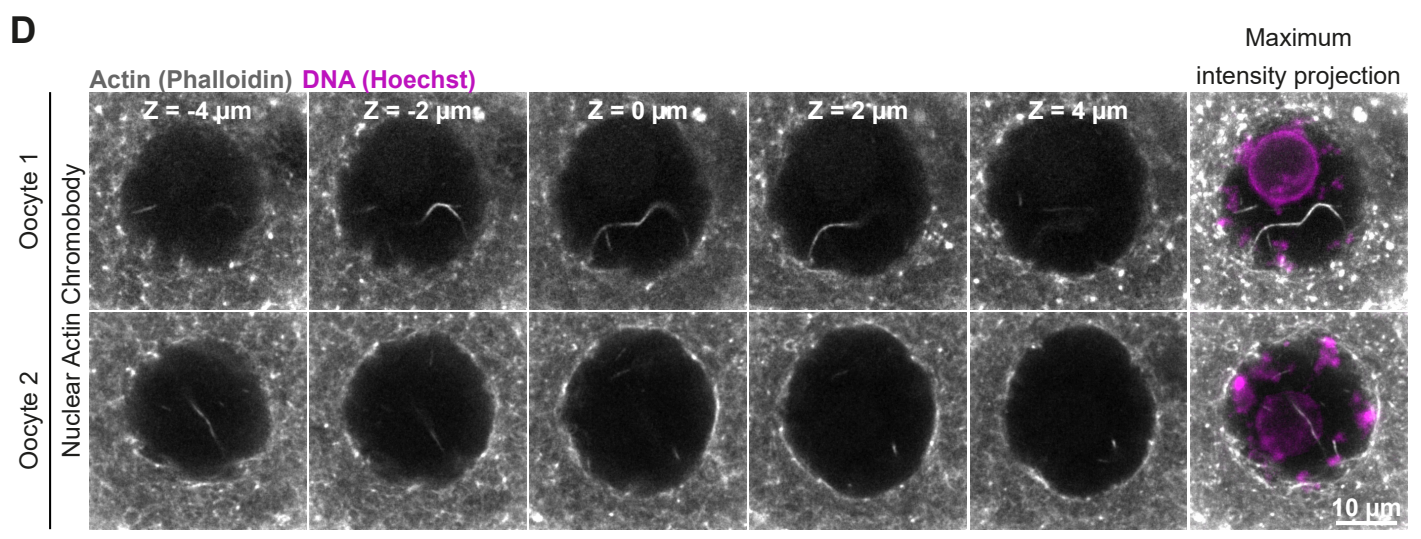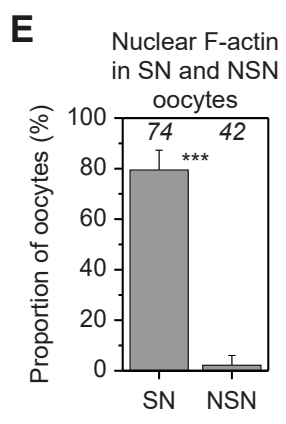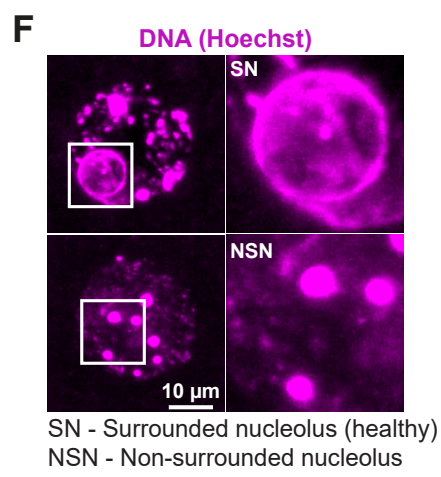

**Fig. S1 Nuclear F-actin is a common feature in healthy mammalian oocytes**

**(A)** Phalloidin labelled nuclear actin filaments (grey) and chromosomes (Hoechst, magenta) in prophase-arrested oocyte isolated from 129sv mouse (inbred) strain. Single confocal sections spaced 2  $\mu\text{m}$  apart and corresponding maximum intensity projections are shown.

**(B)** Quantification of nuclear F-actin presence in prophase-arrested 129sv strain mouse oocytes. Data are from 3 independent experiments.

**(C)** Maximum intensity projection (9 confocal sections) images of phalloidin labelled nuclear F-actin (grey), DNA (magenta) and nuclear membrane (green) in two sheep oocytes. Single confocal sections spaced 2  $\mu\text{m}$  apart are shown. Isosurface reconstruction of actin (white) demonstrates prominent nuclear actin filaments. Sheep oocytes from two independent experiments are shown.

**(D)** Phalloidin labelled nuclear actin filaments (grey) and chromosomes (Hoechst, magenta) in prophase-arrested mouse oocytes fixed after expression and live imaging of nuclear actin chromobody. Single confocal sections spaced 2  $\mu\text{m}$  apart and corresponding maximum intensity projections are shown.

**(E)** Quantification of nuclear F-actin presence in prophase-arrested mouse oocytes with surrounded nucleolar (SN) and non-surrounded nucleolar (NSN) chromatin configuration. Data are from 3 independent experiments. Fisher's exact test was used to test for significance.

**(F)** Representative images of surrounded nucleolar (SN) and non-surrounded nucleolar (NSN) chromatin (magenta) configuration in prophase-arrested oocytes. Boxes mark regions that are magnified in insets.

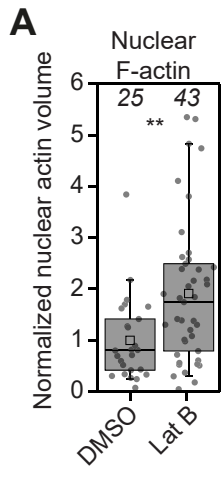

**Fig. S2 Excess cytosolic G-actin causes uncontrolled nuclear F-actin assembly.**

**(A)** Quantification of nuclear F-actin volumes from isosurface reconstructions in 2D in DMSO- or Latrunculin B-treated mouse oocytes. Data are from 3 independent experiments. Y-axis scaling is adjusted to show higher resolution distribution of data shown in Fig. 2F. Two-tailed Student's *t* test was used to test for significance.

# Figure S3

bioRxiv preprint doi: <https://doi.org/10.1101/2020.10.30.353961>; this version posted October 30, 2020. The copyright holder for this preprint (which was not certified by peer review) is the author/funder, who has granted bioRxiv a license to display the preprint in perpetuity. It is made available under aCC-BY-NC-ND 4.0 International license.

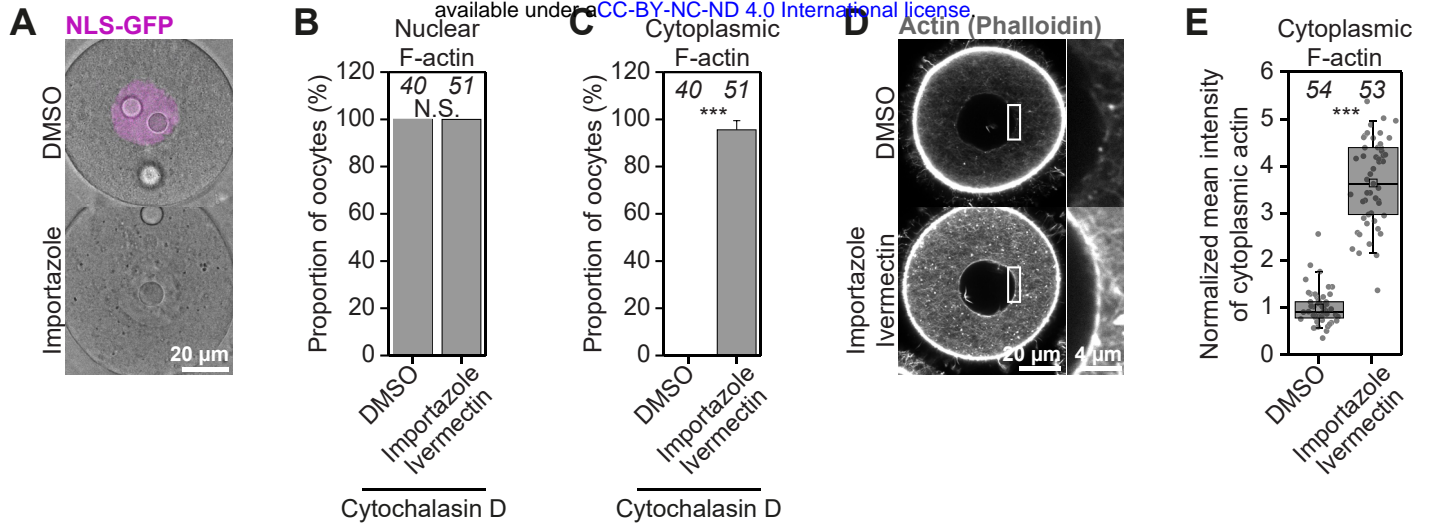

**Fig. S3 Actin monomers are nuclear import cargoes in mouse oocytes.**

(A) Representative images of GFP-NLS in DMSO- or Importazole-treated mouse oocytes.

(B) Quantification of nuclear F-actin presence in DMSO- or Importazole/Ivermectin-treated mouse oocytes that were then treated with Cytochalasin D. Data are from 3 independent experiments.

(C) Quantification of cytoplasmic F-actin network presence in DMSO- or Importazole/Ivermectin-treated mouse oocytes that were then treated with Cytochalasin D. Data are from 3 independent experiments.

(D) Single section Airyscan images of Phalloidin labelled cytoplasmic F-actin in DMSO- or Importazole/Ivermectin-treated mouse oocytes. Boxes mark regions that are magnified in insets.

(E) Quantification of cytoplasmic F-actin network fluorescence intensity in DMSO- or Importazole/Ivermectin-treated mouse oocytes. Data are from 3 independent experiments.

Statistical significance was tested using Fisher's exact test [(B) and (C)] and Two-tailed Student's *t* test (E).

**A**

**Nuclear Actin (Actin Chromobody) Chromosomes (SiR-DNA)**

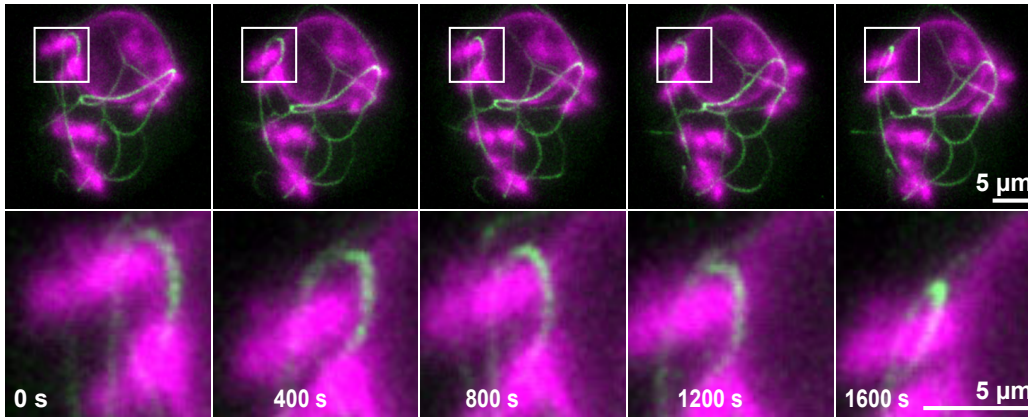

**B**

**Actin (Phalloidin) Chromosomes Microtubules**

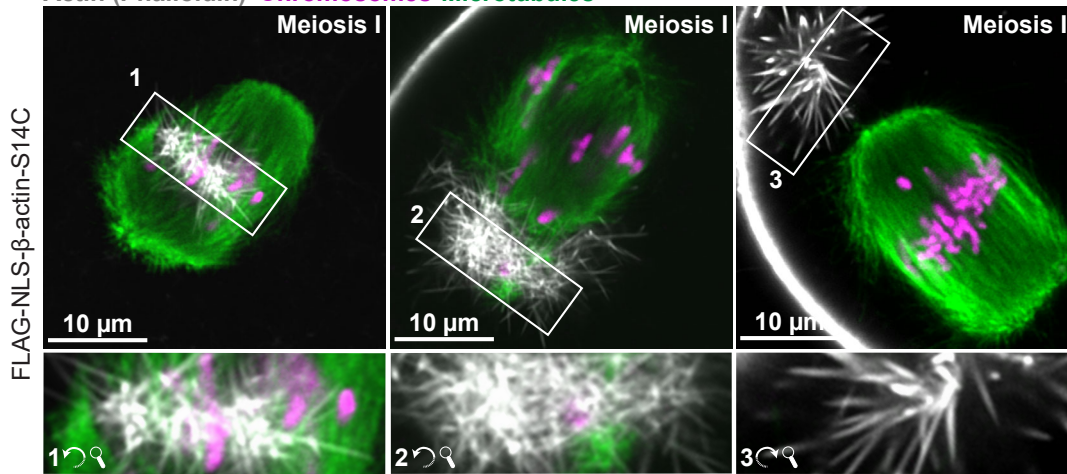

**C**

**Metaphase I**

**Anaphase I**

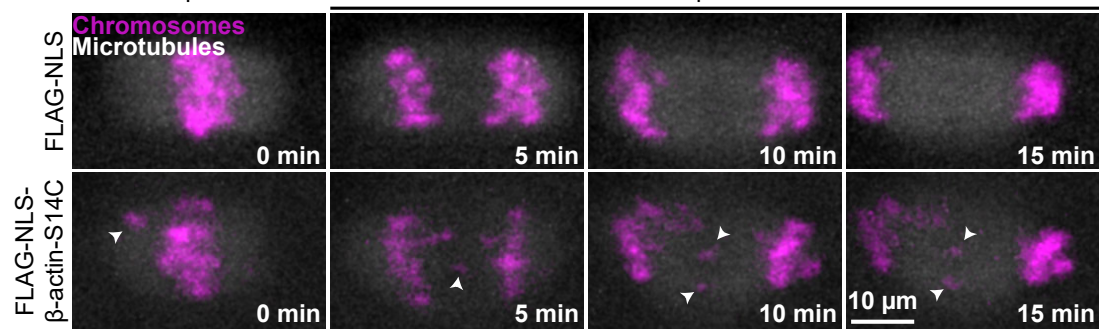



**Fig. S4 Excess nuclear F-actin compromises mammalian oocyte meiosis.**

**(A)** Stills from time lapse movie of chromatin (SiR-DNA, magenta) and nuclear actin (nuclear actin chromobody, green). Boxes mark regions magnified in insets and show entrapment of chromatin by actin filaments.

**(B)** Single section Airyscan images of actin (grey), microtubules (green) and chromosomes (magenta) in S14C actin mutant expressing (excess nuclear F-actin in prophase) meiosis I oocytes and a meiosis II egg. Numbered boxes mark regions containing stable nuclear F-actin remnants that are rotated and magnified in insets.

**(C)** Stills from representative time lapse movies of anaphase I in control or S14C actin mutant expressing oocytes. Microtubules (EGFP-MAP4-MTBD) are shown in grey and chromosomes (H2B-mRFP) are shown in magenta.

# Figure S5

bioRxiv preprint doi: <https://doi.org/10.1101/2020.10.30.353961>; this version posted October 30, 2020. The copyright holder for this preprint (which was not certified by peer review) is the author/funder, who has granted bioRxiv a license to display the preprint in perpetuity. It is made available under aCC-BY-NC-ND 4.0 International license.

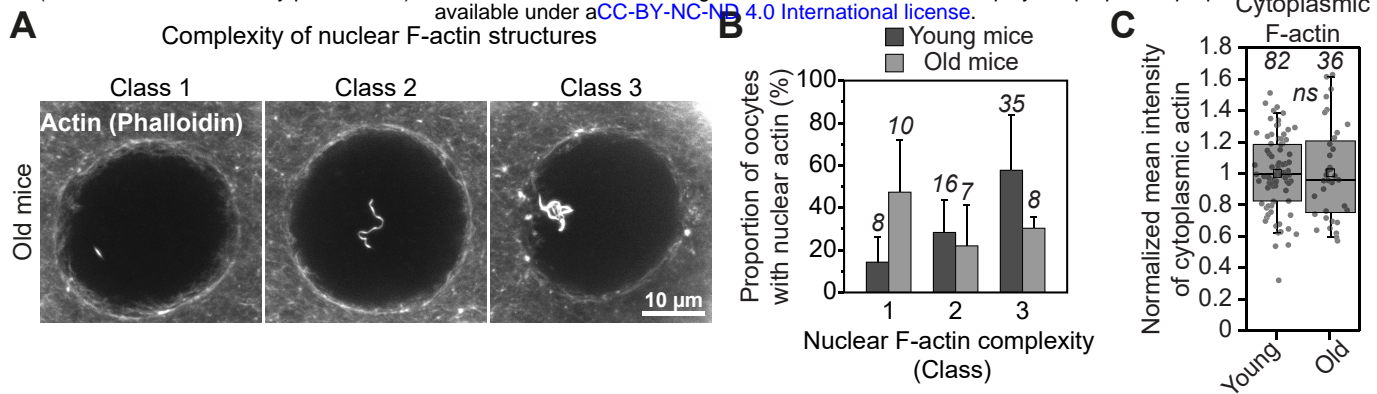

**Fig. S5 Nuclear F-actin declines with maternal age**

**(A)** Three representative classes of nuclear F-actin (grey) complexity in phalloidin labelled mouse oocytes.

**(B)** Quantification of the different classes of nuclear F-actin complexity (shown in A) in oocytes isolated from young and old mice. Data are from 3 independent experiments.

**(C)** Quantification of cytoplasmic F-actin network intensity in oocytes from young and old mice. Data are from 3 independent experiments. Two-tailed Student's *t* test.
